# Supplementary material
Source: publisher site journal article supplement (https://www.spandidos-publications.com/1885/downloadSupplementary)

Figure S1. Spearman's correlation of expression of DEF6 with expression of lymphocytes and immunomodulators in 30 cancer types in the TISIDB database. (A) Correlations between DEF6 and lymphocytes expression levels. (B) Correlations between the DEF6 and immunoinhibitors expression levels. (C) Correlations between the DEF6 and immunostimulators expression levels. (D) Correlations between the DEF6 and MHC molecules expression levels. DEF6, guanine nucleotide exchange factor; MHC, major histocompatibility complex; KIRC, kidney renal clear cell carcinoma.

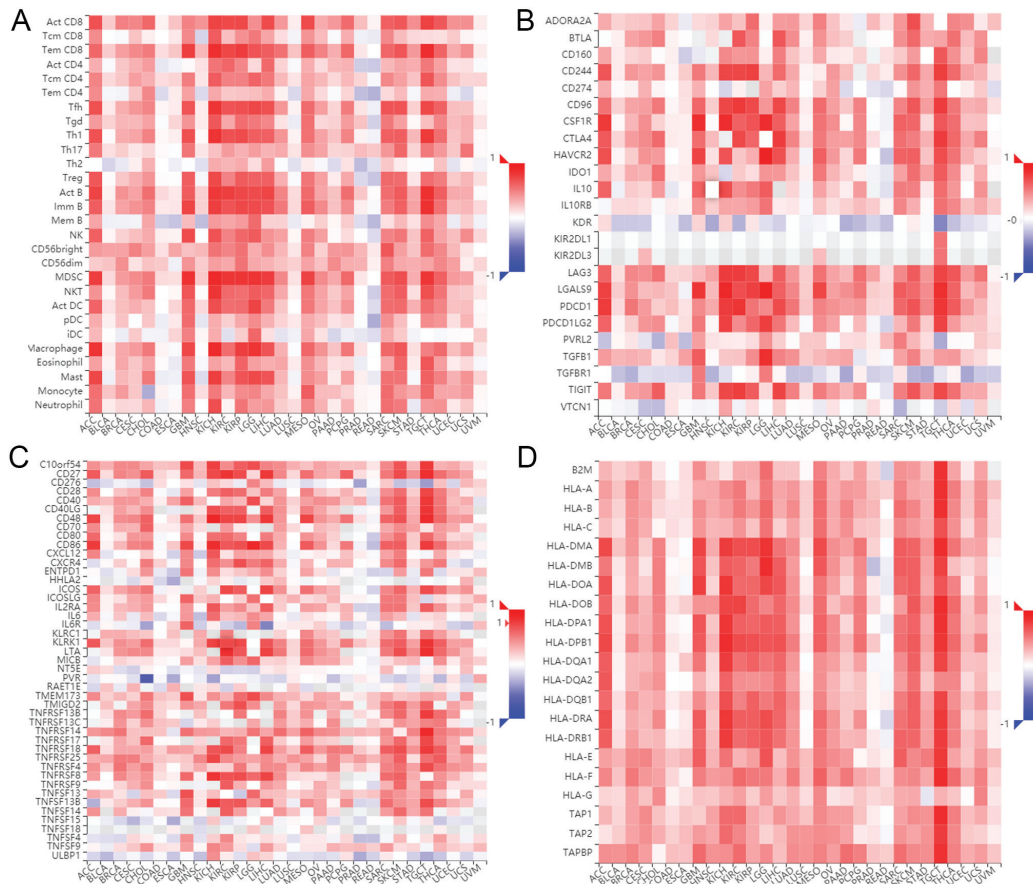

Supplement: Supplementary file 1 [file downloadSupplementary]
